# Supplementary material
Source: ML conference proceedings conference paper supplement (https://aclanthology.org/2026.semeval-1.190)

# Multi-Stage LLM Reasoning Process

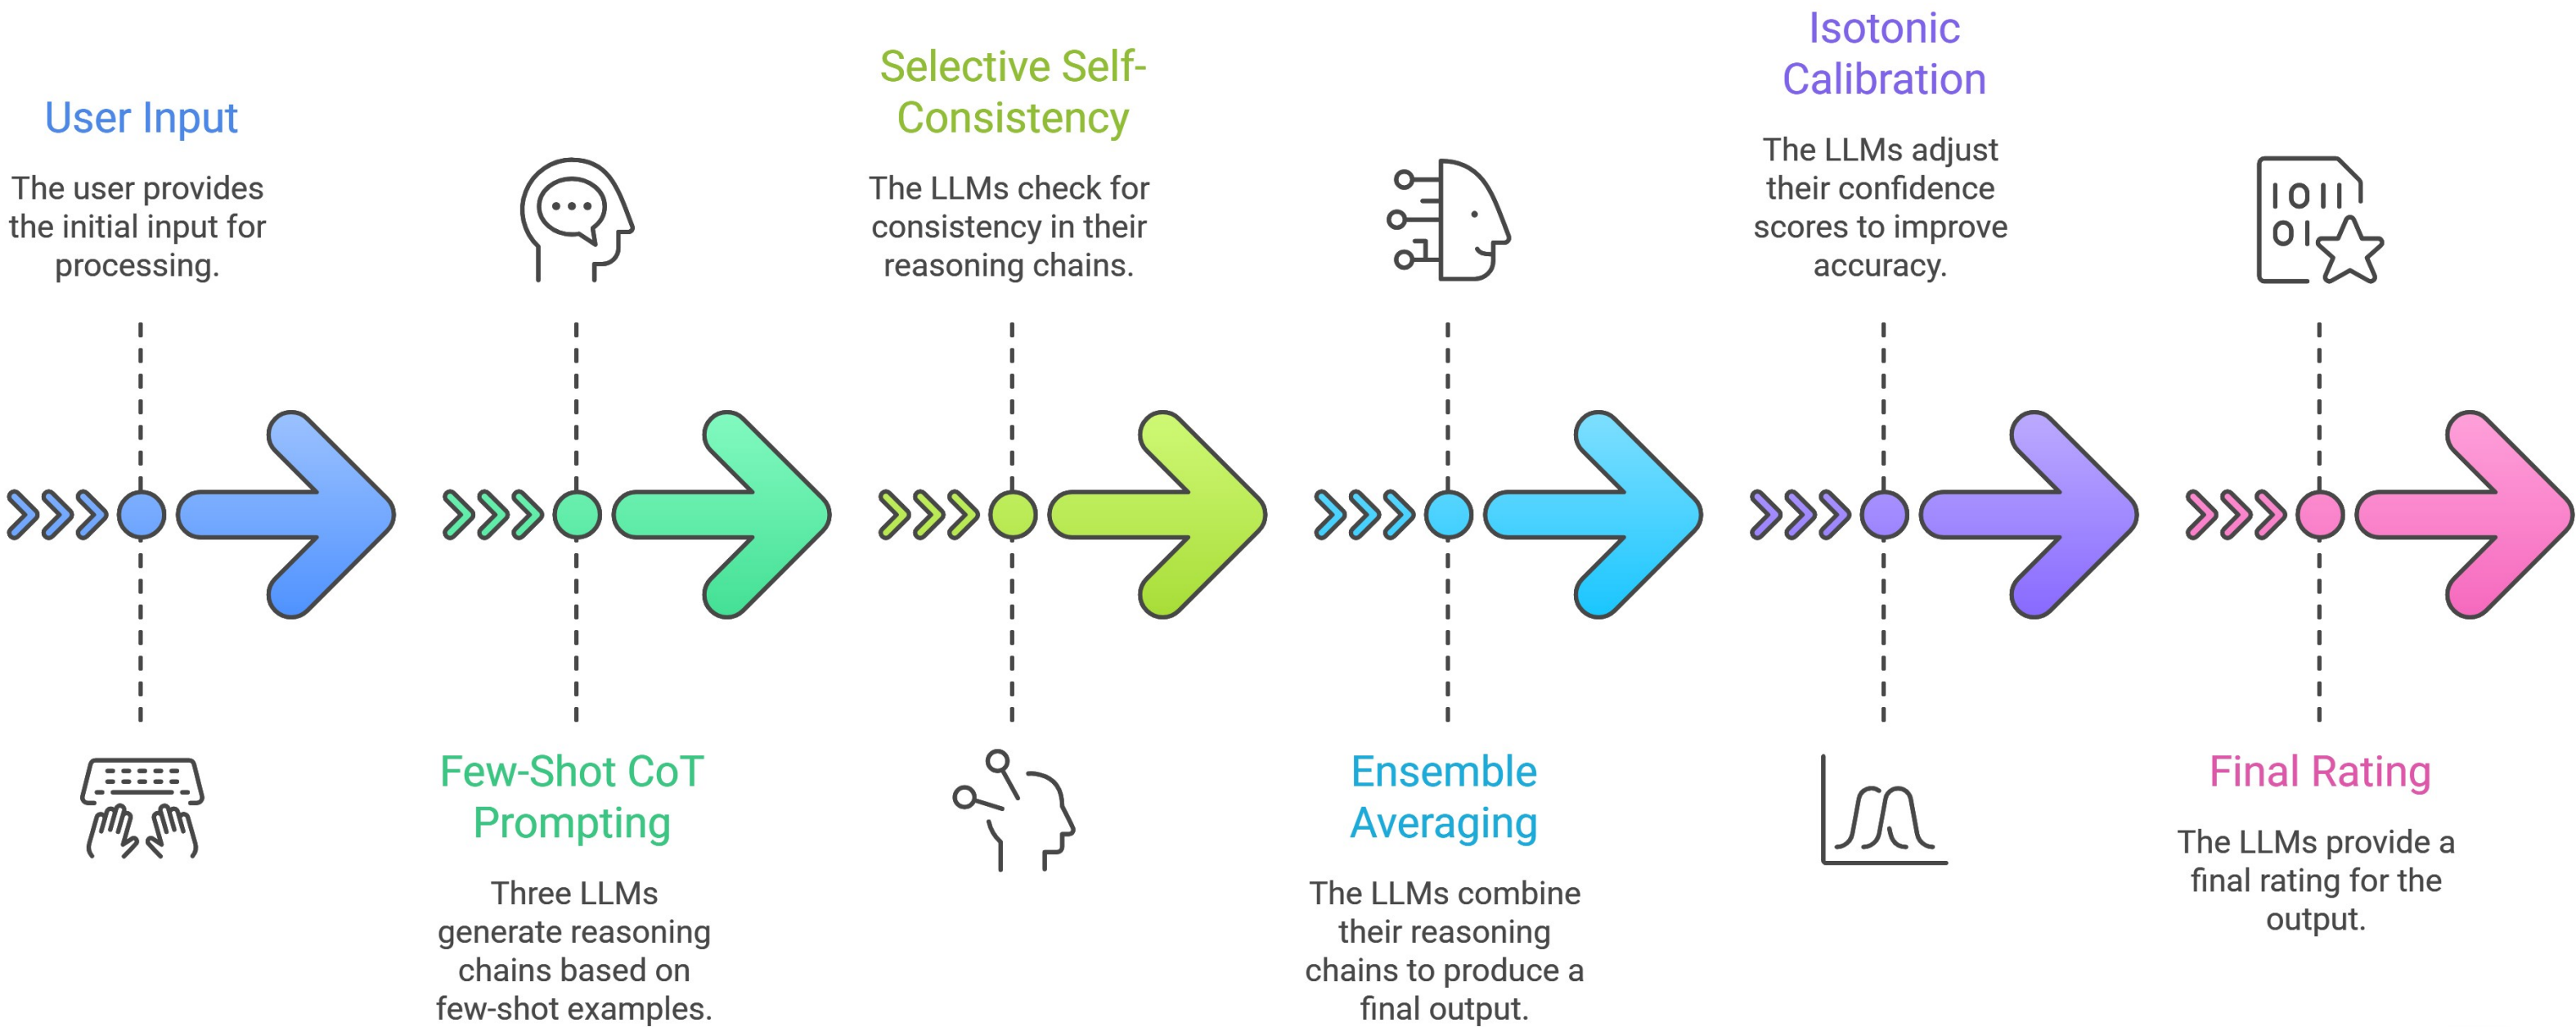

Supplement: SupplementaryMaterial [file pipeline.pdf › latex/Figures/pipeline.pdf]
